# Supplementary material
Source: PubMed Central journal article supplement (PMC9574667)
Supplement: jiac222_supplementary_data.pdf [file jiac222_supplementary_data.pdf]

## Supplemental Information

### HIV-associated alterations of the biophysical features of maternal antibodies correlate with their reduced transfer across the placenta

Sean A. Taylor<sup>a#</sup>, Shilpee Sharma<sup>b#</sup>, Christopher A. L. Remmel<sup>a</sup>, Beth Holder<sup>c</sup>, Christine E. Jones<sup>d\*</sup>, Arnaud Marchant<sup>b\*</sup>, and Margaret E. Ackerman<sup>a\*</sup>

<sup>a</sup>Thayer School of Engineering, Dartmouth College, Hanover, NH, USA

<sup>b</sup>Institute for Medical Immunology, Université Libre de Bruxelles, Brussels, Belgium

<sup>c</sup>Institute of Reproductive and Developmental Biology, Department of Metabolism, Digestion and Reproduction, Imperial College, London, UK

<sup>d</sup>Faculty of Medicine and Institute for Life Sciences, University of Southampton and NIHR Southampton Clinical Research Facility and NIHR Southampton Biomedical Research Centre, University Hospital Southampton NHS Foundation Trust, Southampton, UK

<sup>#</sup>Share first authorship

\*Corresponding authors:

Christine E. Jones

NIHR Southampton Clinical Research Facility and Biomedical Research Centre

University Hospital Southampton, Tremona Road

SO16 6YD Southampton, United Kingdom

Email: [C.E.Jones@soton.ac.uk](mailto:C.E.Jones@soton.ac.uk)

Arnaud Marchant

Institute for Medical Immunology

Campus Erasme

808 Route de Lennik

1070 Bruxelles, Belgium

Email: [arnaud.marchant@ulb.be](mailto:arnaud.marchant@ulb.be)

Margaret E. Ackerman

Thayer School of Engineering, Dartmouth College

14 Engineering Dr

Hanover, NH 03755 USA

Email: [Margaret.E.Ackerman@Dartmouth.edu](mailto:Margaret.E.Ackerman@Dartmouth.edu)

| <b>Supplemental Figures</b> |                                                                                           |
|-----------------------------|-------------------------------------------------------------------------------------------|
| Supplemental Figure 1       | Representative CE spectrum for glycan analysis by capillary electrophoresis               |
| Supplemental Figure 2       | FcRL binding according to infection status and among serum and recombinant IgG subclasses |
| Supplemental Figure 3       | Relationships between transfer efficiency and serum IgG characteristics by UMAP group     |
| <b>Supplemental Tables</b>  |                                                                                           |
| Supplemental Table 1        | Study reagents                                                                            |

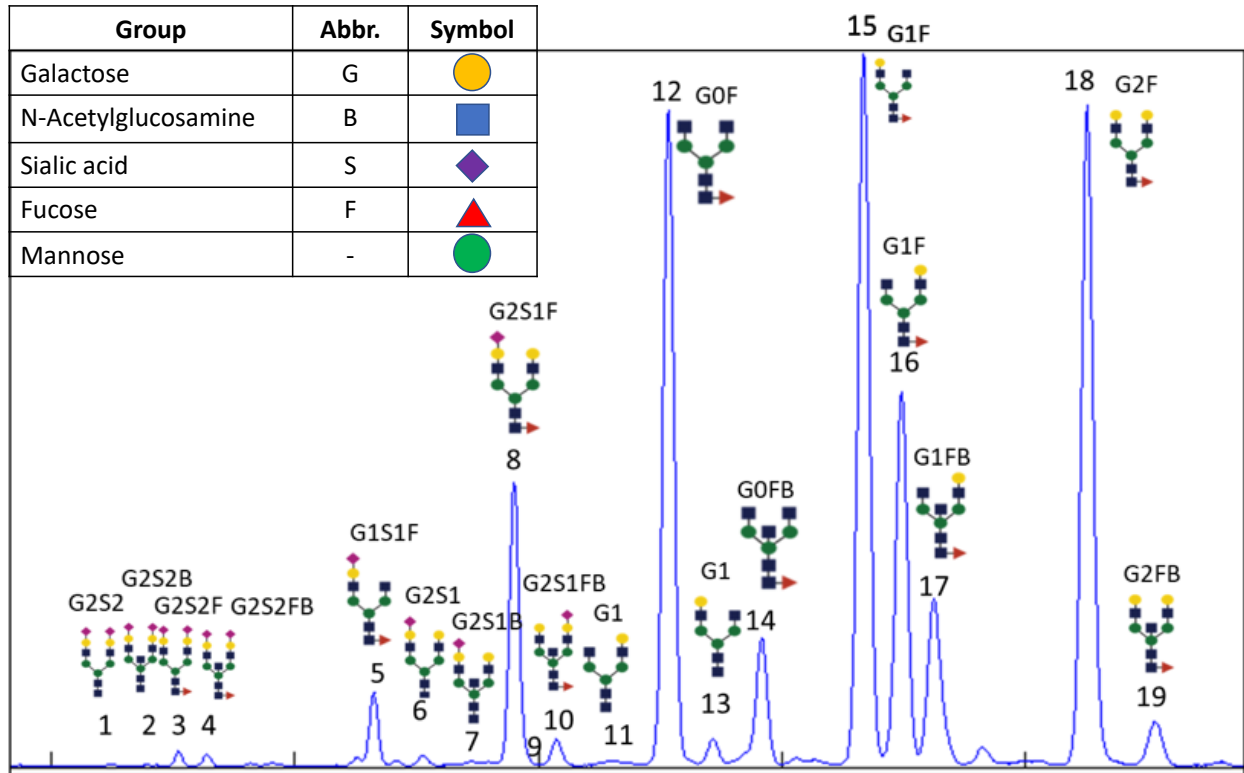

**Supplemental Figure 1: Representative CE spectrum for glycan analysis by capillary electrophoresis.**

Fluorescently-labeled Fc glycans were analyzed by capillary electrophoresis. Individual peaks and their representative glycan structures are shown. The core glycan, consistent across IgG Fc glycoforms is not included in the text label for each glycan.

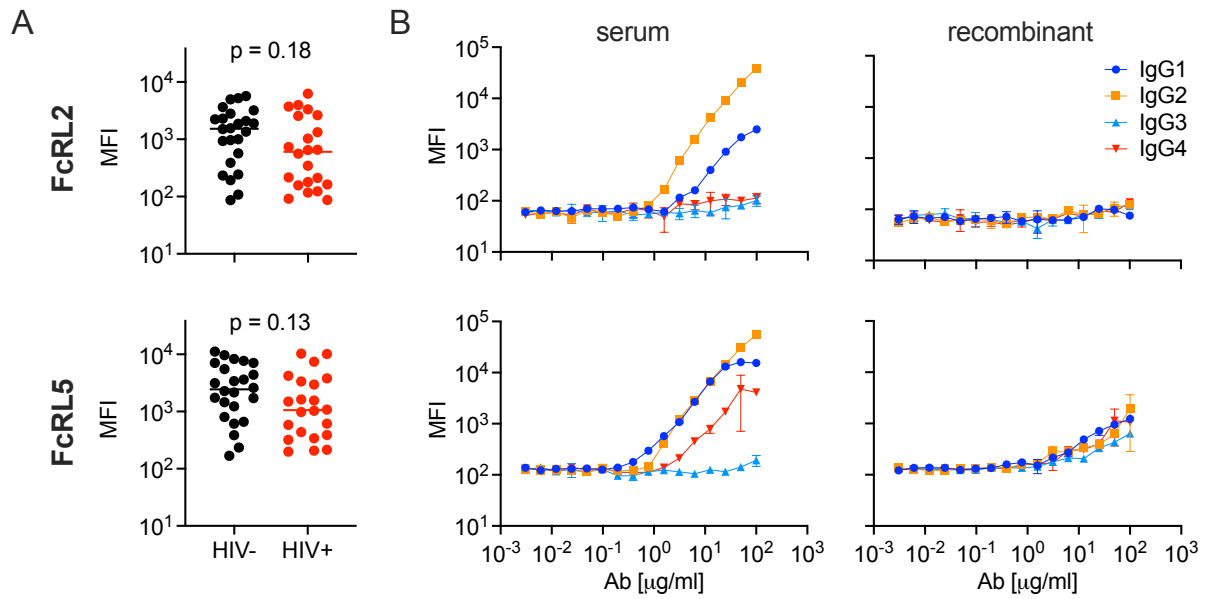

**Supplemental Figure 2: FcRL binding according to infection status and among serum and recombinant IgG subclasses.** **A.** Maternal serum antibody binding to FcRL2 (top) and FcRL5 (bottom) according to HIV infection status and UMAP group. Statistical significance determined by unpaired t-testing. **B.** Binding of serum-derived (left) and recombinantly expressed (right) IgG subclasses (Ab) to FcRL2 (top) and FcRL5 (bottom). Mean fluorescent intensity (MFI) is reported for multiplex assay results. Lines indicate group mean. Error bars indicate standard deviation.

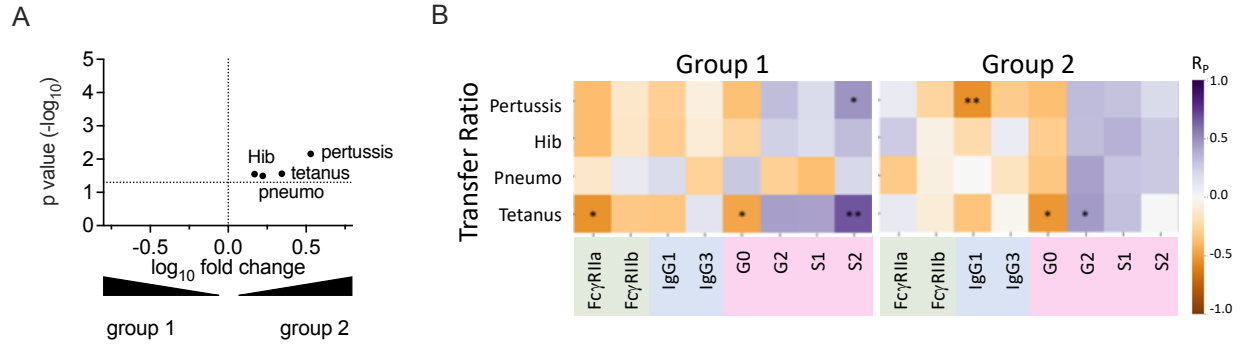

**Supplemental Figure 3: Relationships between transfer efficiency and serum IgG characteristics by UMAP group.** **A.** Volcano plot showing the magnitude and statistical confidence (unpaired t test) of differences in antibody transfer ratios between subjects according to UMAP group status. The dotted horizontal line represents a p value of 0.05 and dotted vertical lines indicate no fold-change. **C.** Heatmaps depicting magnitude and statistical significance of Pearson correlation coefficients ( $R_p$ ) between transfer ratios and IgG subclasses, Fc receptor binding, and the prevalence of major Fc glycoforms in UMAP groups 1 (left) and 2 (right). Color indicates correlation coefficient magnitude and direction, significance is indicated as \*p < 0.05; \*\*p < 0.01.

**Supplemental Table 1. Study Reagents**

| <b>Reagent</b>              | <b>Source</b>     | <b>Catalog number/reference</b> |
|-----------------------------|-------------------|---------------------------------|
| anti-Ig                     | Southern Biotech  | JDC-10                          |
| anti-IgG1                   | Invitrogen        | A10630                          |
| anti-IgG2                   | Southern Biotech  | 31-7-4                          |
| anti-IgG3                   | Invitrogen        | 053600                          |
| anti-IgG4                   | Southern Biotech  | HP6025                          |
| Goat anti-human IgG Fc-PE   | Southern Biotech  | 1030-09                         |
| Mouse anti-human IgG1 Fc-PE | Southern Biotech  | 9054-09                         |
| Mouse anti-human IgG2 Fc-PE | Southern Biotech  | 9070-09                         |
| Mouse anti-human IgG3 Fc-PE | Southern Biotech  | 9210-09                         |
| Mouse anti-human IgG4 Fc-PE | Southern Biotech  | 9200-09                         |
| FcγRI                       | Boesch, 2014      | doi: 10.4161/mabs.28808         |
| FcγRIIA                     | Boesch, 2014      | doi: 10.4161/mabs.28808         |
| FcγRIIB                     | Boesch, 2014      | doi: 10.4161/mabs.28808         |
| FcγRIIIA                    | Boesch, 2014      | doi: 10.4161/mabs.28808         |
| FcRn                        | Feng, 2020        | doi: 10.1016/j.jep.2011.03.012  |
| FcRL2                       | R&D Systems       | 2048-FC-050                     |
| FcRL5                       | R&D Systems       | 2078-FC-050                     |
| FcγBP                       | Novus Biologicals | NBP190462PEP                    |
| FcRLB                       | R&D Systems       | 4868FC050                       |
